# Supplementary material
Source: PubMed Central journal article supplement (PMC10542967)
Supplement: NIHMS1929188-supplement-1.pdf [file NIHMS1929188-supplement-1.pdf]

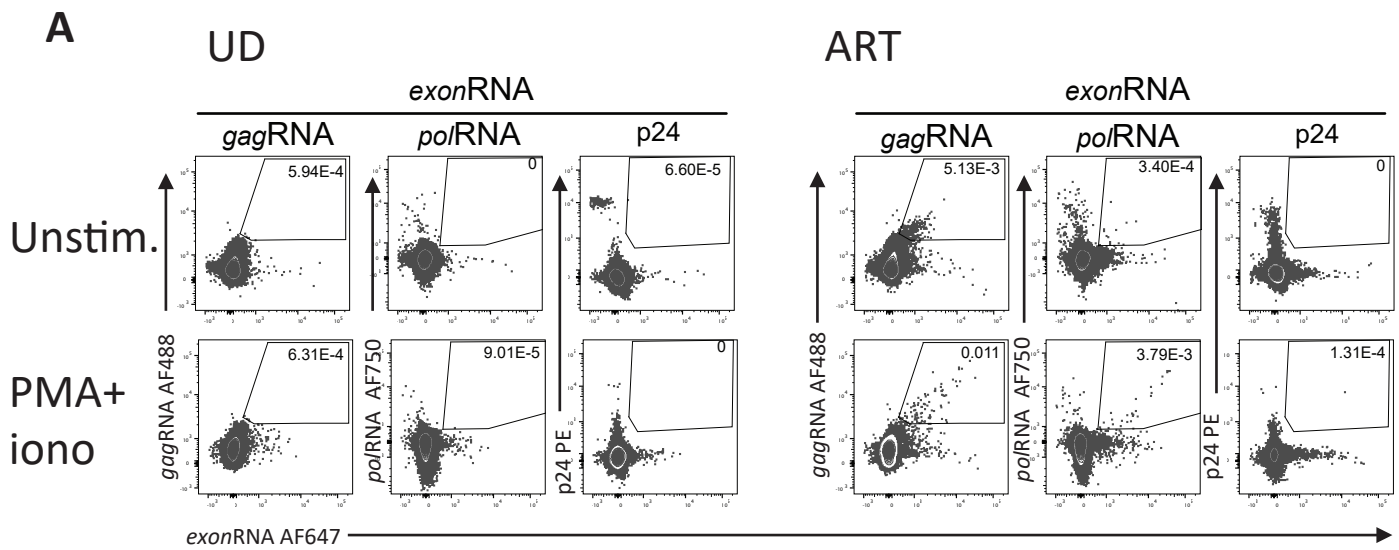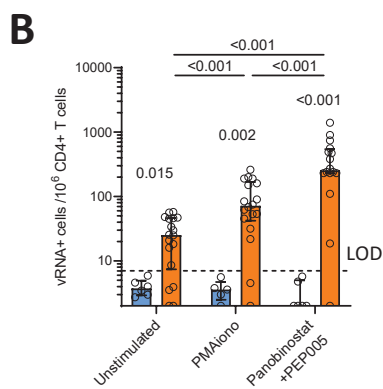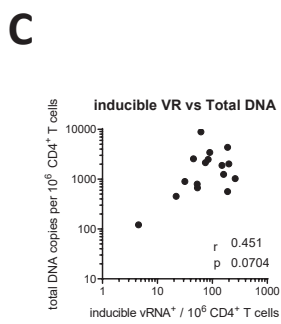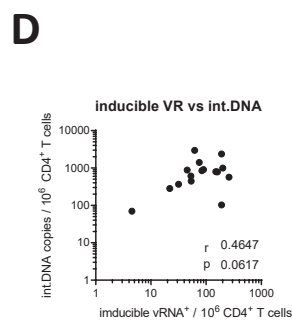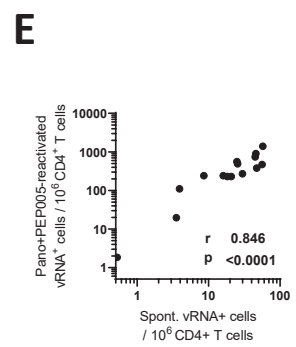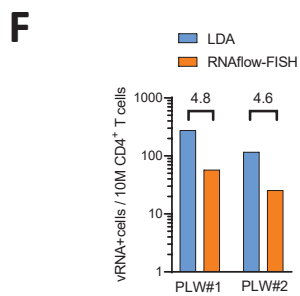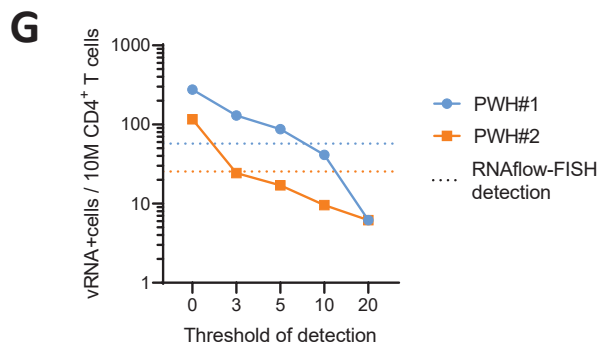

**Supplemental Figure 1: Detection of vRNA expression in purified CD4+ T cells from participants on ART. Related to Figure 1.**

**Figure S1: Detection of vRNA expression in purified CD4<sup>+</sup> T cells from participants on ART. Related to Figure 1. (A)** Gating strategy identifying vRNA<sup>+</sup> cells. **(B)** Complete quantification of vRNA<sup>+</sup> cells from UD and ART participants, i) without stimulation or ii) stimulated with PMAionomycin or iii) a combination of Panobinostat and Ingenol. Two statistical tests are shown: Mann-Whitney to cohort comparisons and Wilcoxon to compare unstimulated vs. PMAionomycin induction. The bars indicate the median, and the error bars illustrate the interquartile range. **(C-E)** Correlations between **(C)** total DNA vs. PMAionomycin-induced, **(D)** integrated DNA vs. PMAionomycin-induced, and **(E)** Panobinostat+Ingenol-induced vs. spontaneously active reservoir. R and p values from Spearman tests are indicated. N =18. **(F)** Compared quantifications of vRNA<sup>+</sup> cells using a limiting dilution RT-qPCR assay and the HIV RNAflow-FISH assay in two PWH. **(G)** Quantification of the RT-qPCR with different threshold of detection. The dash bar correspond to paired HIV RNAflow-FISH detection. The error bars represent standard deviation of 11 technical replicates.

**A**

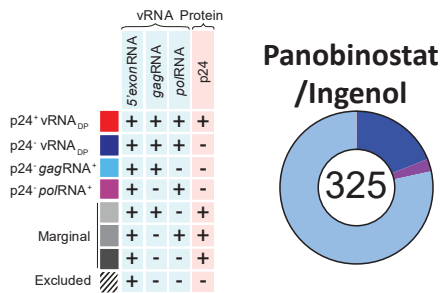

**B**

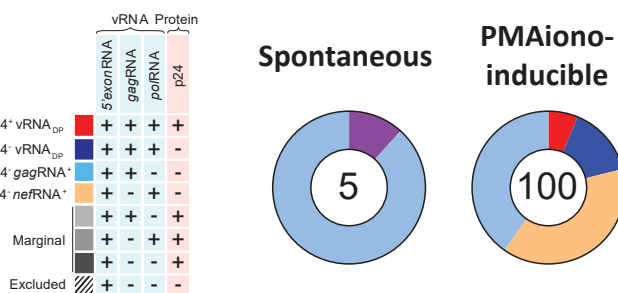

**C**

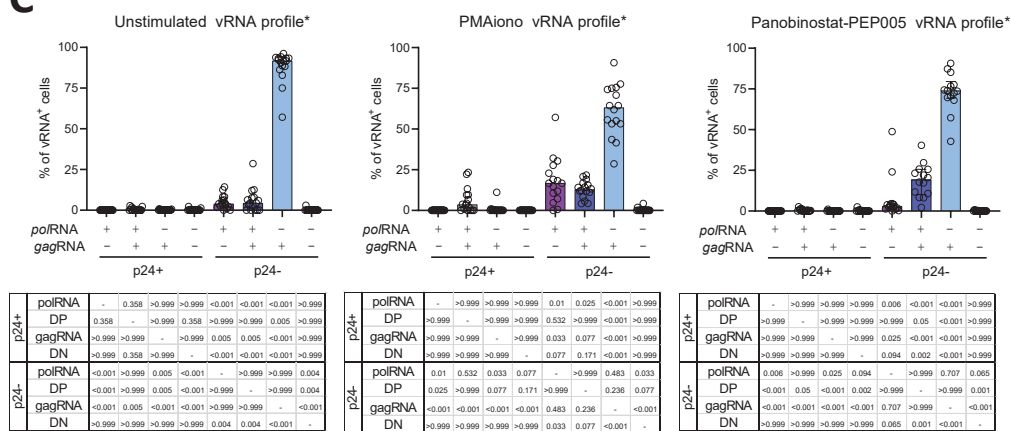

**D**

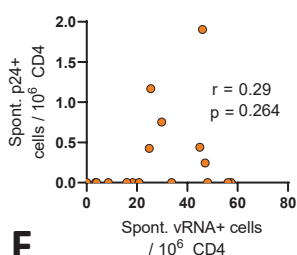

**F**

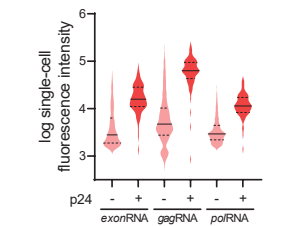

**E**

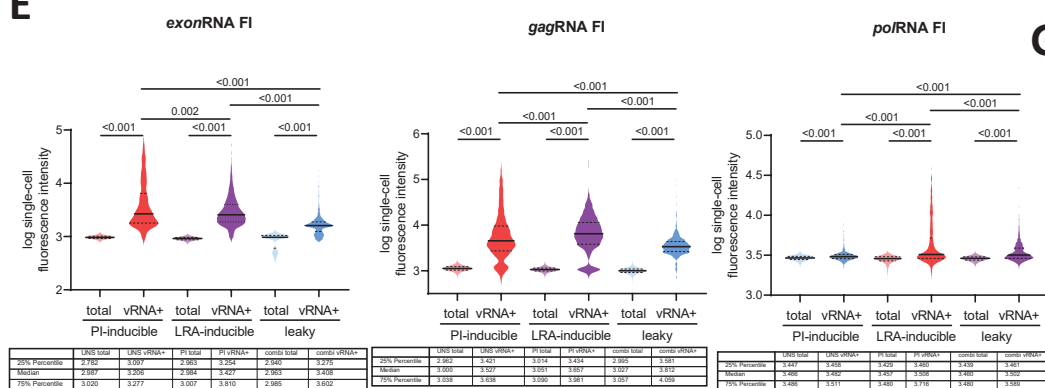

**G**

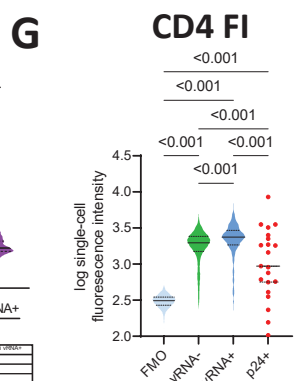

**H**

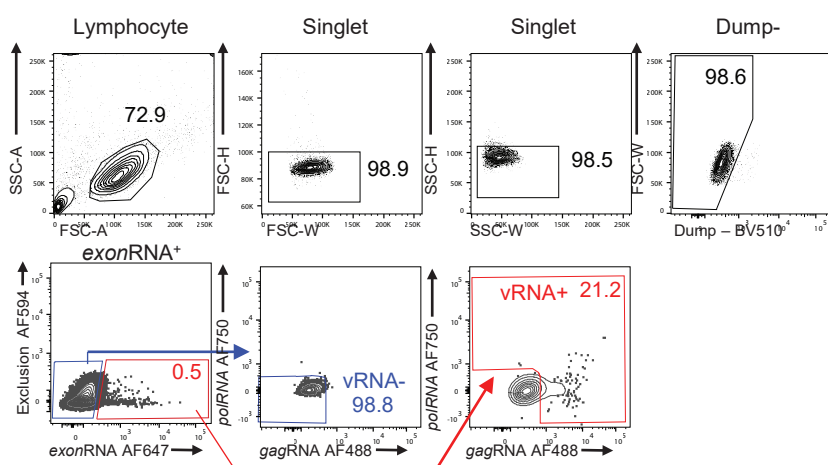

**I**

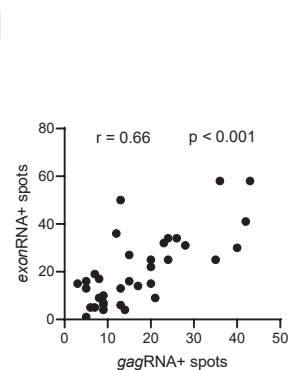

Supplemental Figure 2: Details of the viral gene expression in vRNA<sup>+</sup> cells. Related to Figure 2.

**Figure S2: Details of the viral gene expression in vRNA<sup>+</sup> cells. Related to Figure 2.** (A) A legend listing the different theoretical vRNA<sup>+</sup> populations defined by *exon*RNA, *gag*RNA, and *pol*RNA probesets is shown on the left. Donut charts presenting the median proportions of each vRNA<sup>+</sup> subpopulation for the combinatory Panobinostat+Ingenol stimulation are shown on the right. (B) Legend listing the different theoretical vRNA<sup>+</sup> populations using *exon*RNA, *gag*RNA, and *nef*RNA probesets. Donut charts presenting the median proportions of each vRNA<sup>+</sup> subpopulation for the spontaneously active or PMAionomycin-induced reservoirs. In **AB**, the numbers in the donut hole represent the median vRNA<sup>+</sup> cells per 10<sup>6</sup> CD4 T cells. (C) The histograms report the proportions of each vRNA<sup>+</sup> subpopulation for spontaneously active, PMAionomycin, or Panobinostat+Ingenol-induced reservoirs, supporting Figures 2D and S2A. The bars represent median values. All results from a Friedman test are shown underneath. (D) Correlations between spontaneously active p24<sup>+</sup> and vRNA<sup>+</sup> cells. R and p values are indicated. (E) Violin plots showing single-cell fluorescence intensities for all vRNA<sup>+</sup> cells detected in 17 participants, including Panobinostat+Ingenol stimulation. (F) Single-cell fluorescence intensities of *exon*RNA, *gag*RNA and *pol*RNA in translation-competent vRNA<sup>+</sup>p24<sup>+</sup> cells upon induction by PMAionomycin. For the sake of comparison, the total vRNA<sup>+</sup> population is also represented. N=17. (G) Violin plots showing single-cell CD4 fluorescence intensities in vRNA<sup>+</sup> versus vRNA<sup>-</sup> cells, without stimulation. FMO levels are also indicated. The results from Wilcoxon tests are shown above. N=17 (1 participant with no active vRNA was excluded to maintain a side-by-side comparison). (H) Gating strategy for vRNA<sup>-</sup> and vRNA<sup>+</sup> cell sorting, prior to study by confocal fluorescence microscopy. (I) Correlation between the number of *exon*RNA<sup>+</sup> and *gag*RNA<sup>+</sup> spots per cell.

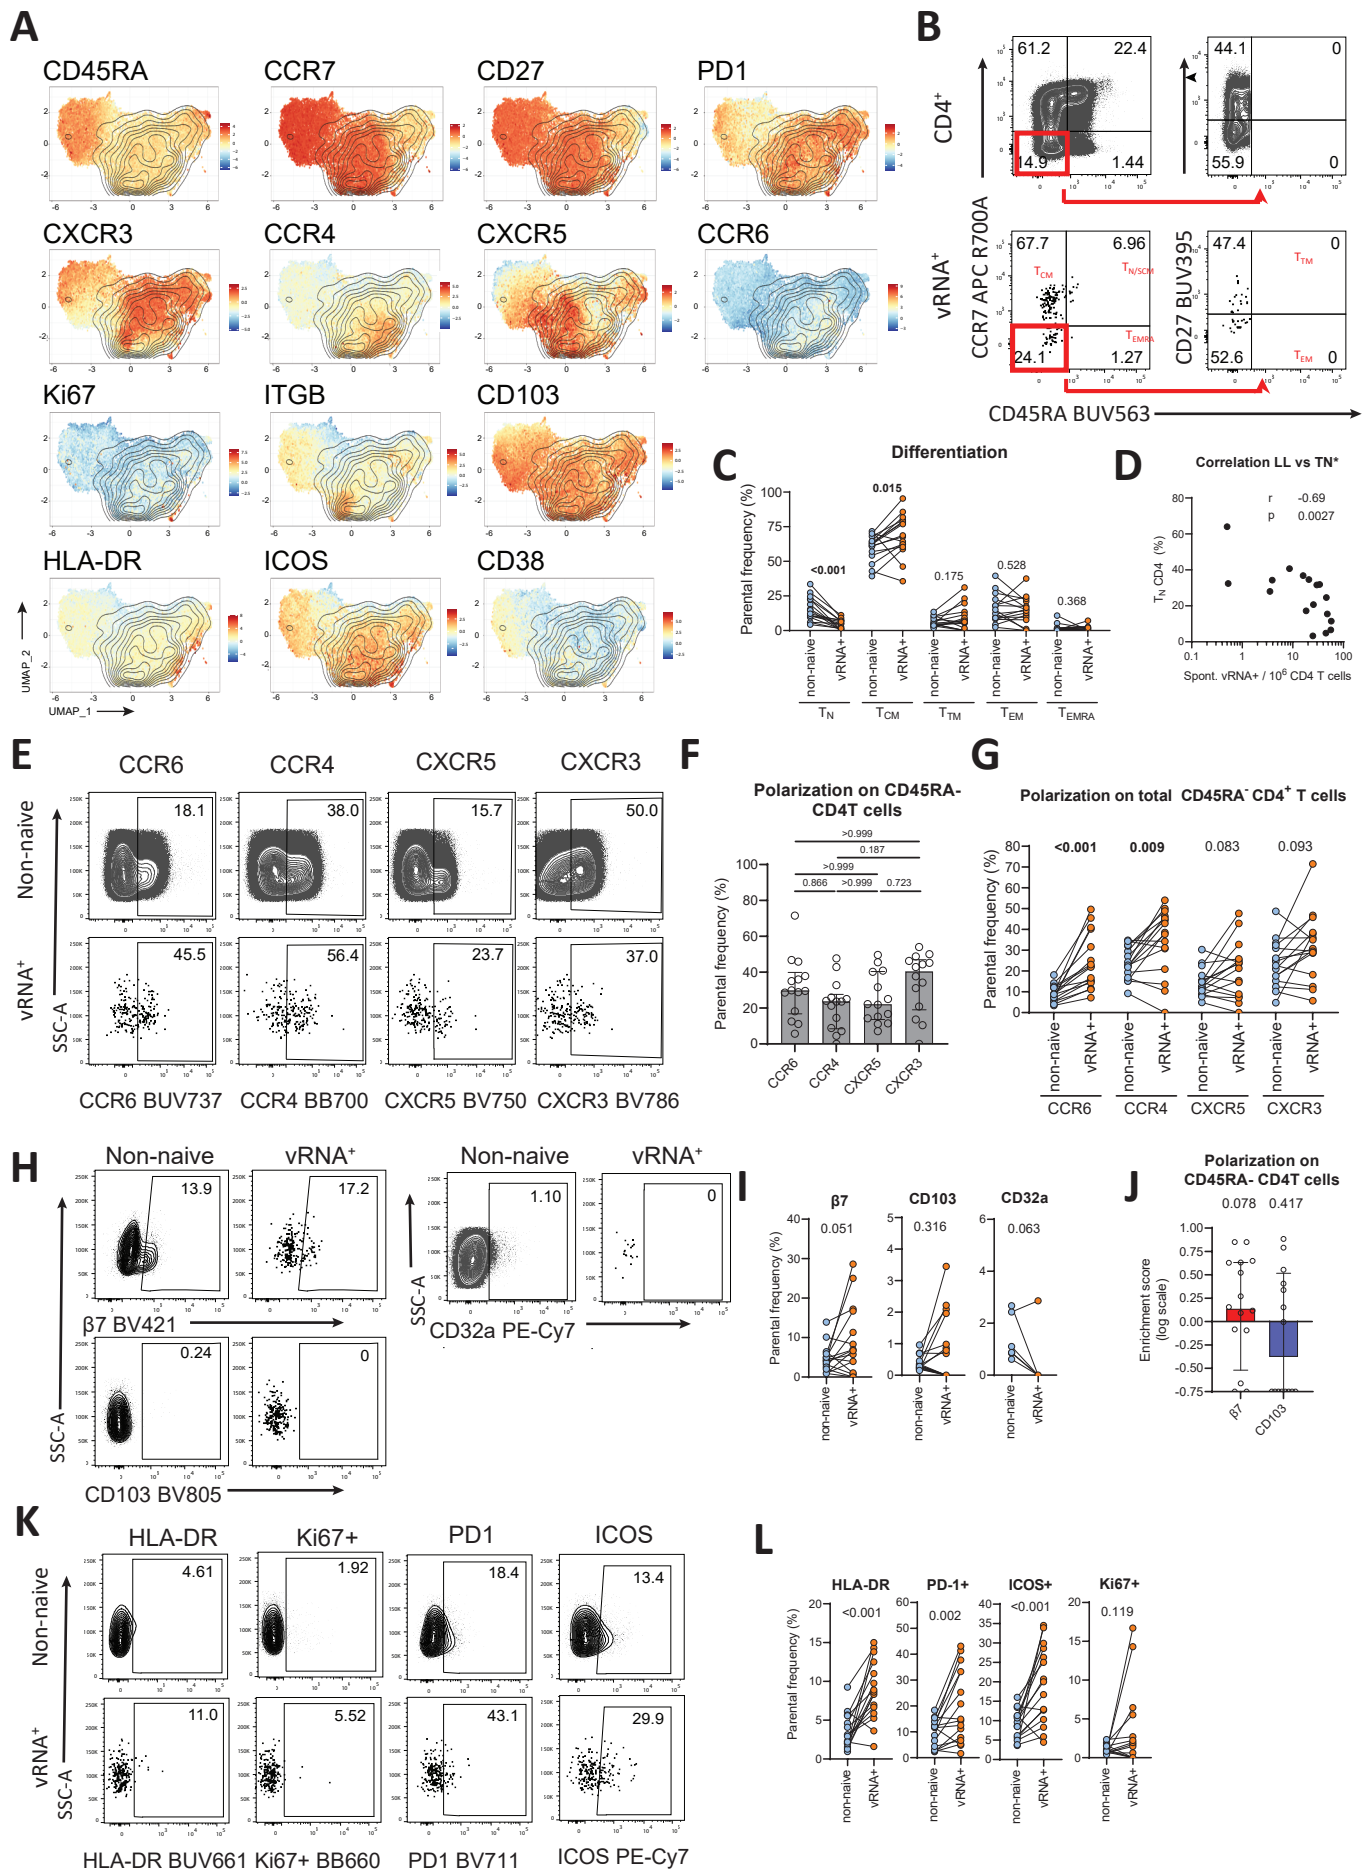

Supplemental Figure 3: Phenotyping of spontaneously active reservoirs. Related to Figure 3.

**Figure S3: Phenotyping of spontaneously active reservoirs. Related to Figure 3.** (A) Multiple iterations of the UMAP representation from Figure 3 where the expression level of each loaded parameter was individually layered. Warm colors indicate high expression, and cold colors are for lower expression. Each feature was subject to scaling to ease the comparison. (BC) Univariate CD4<sup>+</sup> T memory analysis. (B) Representative gating strategy. (C) Relative enrichment of vRNA<sup>+</sup> cells compared to the parental CD4 T cell population. The enrichment is shown for the indicated CD4 T memory subsets, including T naïve. Wilcoxon tests are shown above. (D) Correlation between total CD4<sup>+</sup> T<sub>N</sub> and active vRNA<sup>+</sup> cells. N=17. (EFG) Univariate analyses of vRNA<sup>+</sup> cell polarization. (E) Representative gating strategy. (F) Median frequencies of each single total HIV-specific CD45RA<sup>-</sup> CD4<sup>+</sup> T cell polarization. The bars represent the median and the error bars, the interquartile range. (G) Relative enrichment of vRNA<sup>+</sup> cells compared to the parental CD4<sup>+</sup> T cell population for each tested polarization marker. Wilcoxon tests are shown above. (HIJ) Univariate analyses of β7 and CD103 expression on vRNA<sup>+</sup> cells. (H) Representative gating strategy. (I) Relative enrichment of vRNA<sup>+</sup> cells compared to the parental CD4<sup>+</sup> T cell population for each tested marker. Wilcoxon tests are shown above. (J) Enrichment score. (KL) Univariate analyses of activation markers on vRNA<sup>+</sup> cells. (K) Representative gating strategy. (L) Relative enrichment of vRNA<sup>+</sup> cells compared to the parental CD4<sup>+</sup> T cell population for each tested activation marker. Wilcoxon tests are shown above. (A-C, E-L) N=16 (2 participants had <5 vRNA<sup>+</sup> cells, our threshold for phenotyping).



**Figure S4: AIM and ICS assays. Related to Figure 4.** (A) Representative gating of each AIM pair was used for the ORgate analysis of Gag-specific CD4<sup>+</sup> T cell responses. The same gating was applied for Pol, Env, and Nef-specific CD4<sup>+</sup> T cells. (B) Raw CD4<sup>+</sup> (top) and CD8<sup>+</sup> (down) T cell responses, comparing the unstimulated vs. peptide-stimulated conditions. The bars indicate the median, and the error bars illustrate the interquartile range. The results from Wilcoxon tests are shown above the histograms. (C) Representative gating of each cytokine used for the ORgate analysis of Gag-specific effector CD4<sup>+</sup> T cell responses. The same gating was applied for Pol, Env, and Nef-specific CD4<sup>+</sup> T cells. (D) Raw CD4<sup>+</sup> (top) and CD8<sup>+</sup> (down) T cell responses compared the unstimulated vs. peptide-stimulated conditions. The bars indicate the median, and the error bars illustrate the interquartile range. The results from Wilcoxon tests are shown above the histograms. N=16 (1 participant had < 5 vRNA+ cells, therefore could not be phenotyped).



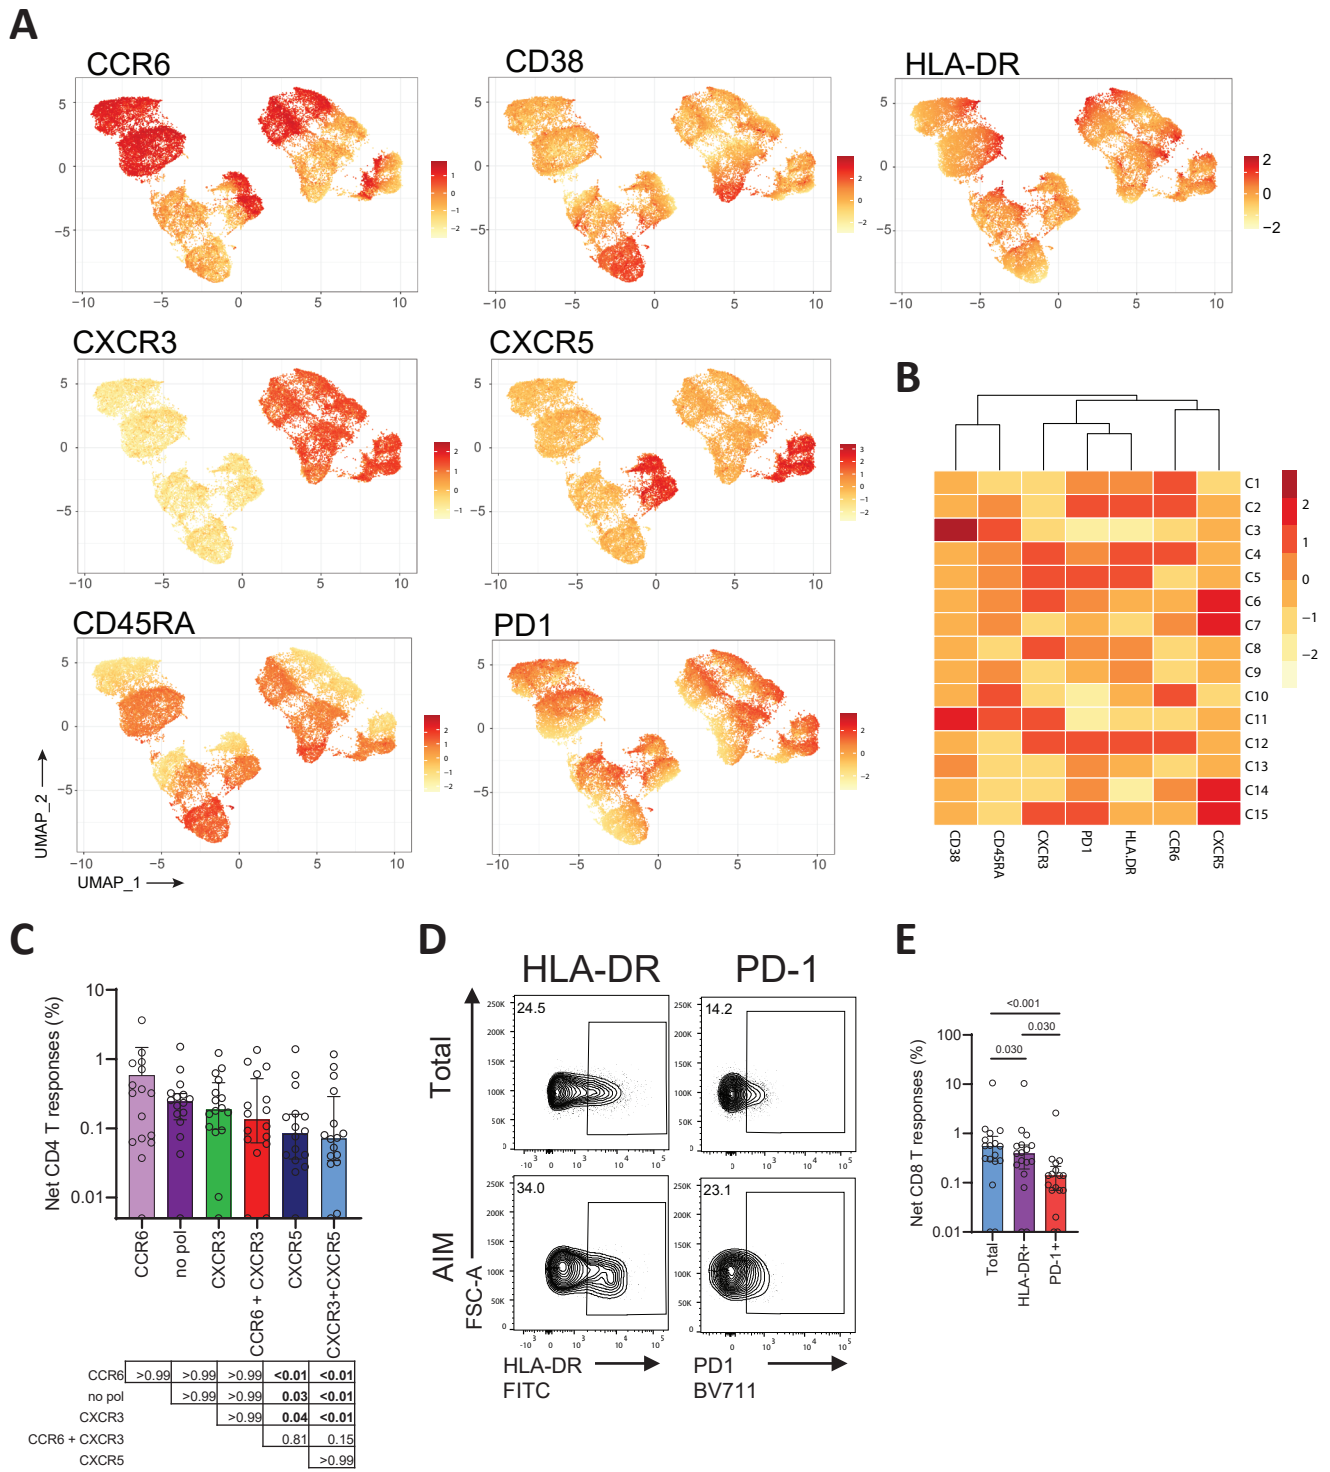

**Supplemental Figure 5: Cell markers distribution in the AIM+ UMAP representation. Related to Figure 5.**

**Figure S5: Cell markers distribution in the AIM<sup>+</sup> UMAP representation. Related to Figure 5. (A)** Multiple iterations of the same UMAP representation from Figure 6 where the expression level of each loaded parameter was individually layered. Warm colors indicate high expression, cold is for lower expression. Each feature was subject to scaling to ease comparison. **(B)** Heat map showing an unsupervised clustering of the 15 clusters defined by the MFI of each loaded parameter. N = 17. **(C)** Histogram showing the magnitudes of net HIV-specific AIM<sup>+</sup> CD4<sup>+</sup> T cell responses per superclusters. The bars indicate median values, and the error bars represent the interquartile range. Stats shown underneath are results for a Friedman test with multiple comparisons, with Dunn correction. N=17 **(D)** Representative examples of HLA-DR and PD1 AIM<sup>+</sup> CD8<sup>+</sup> T cell gatings. **(E)** Histogram showing the magnitudes of net HIV-specific AIM<sup>+</sup> CD8<sup>+</sup> T cell responses. The bars indicate median values, and the error bars represent the interquartile range. Stats shown underneath are results for a Friedman test with multiple comparisons, with Dunn correction. N=17

**Table S1. Clinical characteristics of the study participants. Related to Figures 1 to 6. †**

|                           | PLWH on ART<br>n = 18   | Uninfected controls<br>n = 6         |
|---------------------------|-------------------------|--------------------------------------|
| Age (year old)            | <b>55</b> (51-58)       | <b>51</b> (42-56)                    |
| Sex                       | <b>100%</b> male        | <b>50%</b> male<br><b>50%</b> female |
| Duration of infection (y) | <b>19.6</b> (12.9-24.1) | NA                                   |
| Time before ART (y)       | <b>3.9</b> (1.3-11.9)   | NA                                   |
| Time on ART (y)           | <b>10.8</b> (6.6-26.9)  | NA                                   |
| CD4 counts                | <b>619</b> (436-813)    | <b>582</b> (531-703)                 |
| CD8 counts                | <b>1179</b> (565-1373)  | <b>298</b> (252-359)                 |
| CD4/CD8 ratio             | <b>0.52</b> (0.34-1.15) | <b>2.14</b> (1.99-2.28)              |
| Log Pre-ART VL            | <b>4.41</b> (4.21-4.94) | -                                    |

† Values displayed in bold are medians. Interquartile ranges are shown in parentheses for continuous variables. Percentages were used for categorical variables.

**Table S2. Flow cytometry antibody staining panel for viral reservoir characterization. Related to the STAR Methods section.**

| Marker-Fluorophore                    | Clone    | Vendor          | Catalog #       |
|---------------------------------------|----------|-----------------|-----------------|
| In culture                            |          |                 |                 |
| CCR4 – BB700                          | 1G1      | BD Biosciences  | 566475          |
| CCR7 – APC R700                       | 2-L1-A   | BD Biosciences  | 566767          |
| CXCR5 – BV750                         | RF8B2    | BD Biosciences  | 747111          |
| CXCR3 – BV786                         | G025H7   | BioLegend       | 353738          |
| CCR6 – BUV737                         | 11A9     | BD Biosciences  | 564377          |
| CD103 – BUV805                        | Ber-ACT8 | BD Biosciences  | 748501          |
| Surface staining                      |          |                 |                 |
| CD4 – BB630                           | SK3      | BD Biosciences  | CUSTOM          |
| CD38 – BB790                          | HIT2     | BD Biosciences  | CUSTOM          |
| $\beta$ 7-integrin – BV421            | Fib504   | BD Biosciences  | 564283          |
| CD8 – BV480                           | RPA-T8   | BD Biosciences  | 566121          |
| CD14 – BV480                          | M5E2     | BD Biosciences  | 746304          |
| CD16 – BV480                          | 3G8      | BD Biosciences  | 566108          |
| CD19 – BV480                          | HIB19    | BD Biosciences  | 746457          |
| CD56 – BV480                          | NCAM16.2 | BD Biosciences  | 566124          |
| PD1 – BV711                           | EH12.2H7 | BioLegend       | 329928          |
| CD27 – BUV395                         | L128     | BD Biosciences  | 563815          |
| CD3 – BUV496                          | UCHT1    | BD Biosciences  | 612941          |
| CD45RA – BUV563                       | HI100    | BD Biosciences  | 612926          |
| HLA-DR – BUV661                       | G46-6    | BD Biosciences  | 612980          |
| ICOS – PE-Cy7                         | ISA-3    | eBiosciences    | 25-9948-42      |
| Intracellular staining                |          |                 |                 |
| p24 – PE                              | KC57     | Beckman Coulter | 6604667         |
| Ki67 – BB660                          | B56      | BD Biosciences  | 624295          |
| RNAflow-FISH probeset                 |          |                 |                 |
| <i>exon</i> RNA probe – AF647         | NA       | Thermofisher    | VF1-6000978-210 |
| <i>gag</i> RNA probe – AF488          | NA       | Thermofisher    | VFKA3CY-210     |
| <i>pol</i> RNA probe – AF750          | NA       | Thermofisher    | VF6-18315       |
| Dye                                   |          |                 |                 |
| LIVE/DEAD Fixable dead cell eFluor506 | NA       | Thermofisher    | 65-0866-14      |

**Table S3. Flow cytometry antibody staining panel for activation-induced marker assay. Related to the STAR Methods section.**

| Marker-Fluorophore            | Clone  | Vendor                   | Catalog # |
|-------------------------------|--------|--------------------------|-----------|
| In culture                    |        |                          |           |
| CD183 (CXCR3) – BV605         | G025H7 | Biolegend                | 353728    |
| CD185 (CXCR5) – BV421         | J25D4  | Biolegend                | 356920    |
| CD196 (CCR6) – BUV737         | 11A9   | BD                       | 564377    |
| Surface                       |        |                          |           |
| CD3 – BUV496                  | UCHT1  | BD                       | 612941    |
| CD4 – BB630                   | SK3    | BD                       | 624294    |
| CD8 – BV570                   | RPA-T8 | Biolegend                | 301037    |
| CD14 – BV480                  | M5E2   | BD                       | 746304    |
| CD19 – BV480                  | HIB19  | BD                       | 746457    |
| CD38 – BB790                  | HIT2   | BD                       | CUSTOM    |
| CD45RA – PerCP Cy5.5          | HI100  | BD                       | 563429    |
| CD69 – BV650                  | FN50   | Biolegend                | 310934    |
| CD134 (OX40) - APC            | ACT35  | BD                       | 563473    |
| CD137 (4-1BB) – PE-Dazzle 594 | 4B4-1  | Biolegend                | 309826    |
| CD154 (CD40L) - PE            | TRAP1  | BD                       | 555700    |
| CD279 (PD1) – BV711           | EH122H | Biolegend                | 329928    |
| HLA-DR - FITC                 | LN3    | Biolegend                | 327005    |
| Dye                           |        |                          |           |
| LIVE/DEAD Fixable dead cell   | N/A    | Thermo Fisher Scientific | L34960    |

**Table S4. Flow cytometry antibody staining panel for intracellular detection. Related to the STAR Methods section.**

| Marker-Fluorophore     | Clone     | Vendor         | Catalog #  |
|------------------------|-----------|----------------|------------|
| Surface                |           |                |            |
| CD3 – BV650            | UCHT1     | BD Biosciences | 563852     |
| CD4 – BV605            | RPA-T4    | BD Biosciences | 562658     |
| CD8 – APCeFluor780     | SK1       | eBioscience    | 47-0087-42 |
| CD14 – V500            | M5E2      | BD Biosciences | 561391     |
| CD19 – V500            | H1B189    | BD Biosciences | 561121     |
| CD69 – PerCP-eFluor710 | FN50      | eBioscience    | 46-0699-42 |
| CD107A – BV785         | H4A3      | BD Biosciences | 563869     |
| PD-1 – BV421           | EH12.2H7  | Biolegend      | 329920     |
| Intracellular          |           |                |            |
| IFN- $\gamma$ – PE-Cy7 | B27       | BD Biosciences | 557643     |
| CD154 (CD40L) – PE     | TRAP1     | BD Biosciences | 555700     |
| IL-2 – AF488           | MQ1-17H12 | Biolegend      | 500314     |
| TNF - APC              | Mab11     | BD Biosciences | 562084     |
| Dye                    |           |                |            |
| Aquavidin              | NA        | Invitrogen     | L34966     |

**Table S5: Single-cell vRNA+ sequences accession numbers. Related to Figure 3.**

| Sequence number               | GenBank accession number |
|-------------------------------|--------------------------|
| PWH9_L3p1_A2_C0_434           | OR105517                 |
| PWH5_L2p3_A9_PCR2_G9_C0_455   | OR105518                 |
| PWH5_L2p2_F6_C0_290           | OR105519                 |
| PWH5_L2p2_E10_C0_386          | OR105520                 |
| PWH5_L2p2_E9_PCR2_E9_C0_454   | OR105521                 |
| PWH5_L2p2_E3_C0_463           | OR105522                 |
| PWH5_L2p2_D10_C0_432          | OR105523                 |
| PWH5_L2p1_C12_PCR2_C12_C0_440 | OR105524                 |
| PWH5_L2p1_C10_C0_473          | OR105525                 |
| PWH5_L2p1_C6_PCR2_C6_C0_474   | OR105526                 |
| PWH5_L2p1_B7_C0_325           | OR105527                 |
| PWH5_L2p1_B4_C0_391           | OR105528                 |
| PWH5_L2p1_A10_C0_341          | OR105529                 |
| PWH3_L1p3_B11_C0_402          | OR105530                 |
| PWH3_L1p3_A5_C0_417           | OR105531                 |
| PWH3_L1p3_A3_C0_418           | OR105532                 |
| PWH3_L1p2_H12_C0_390          | OR105533                 |
| PWH3_L1p2_H4_C0_378           | OR105534                 |
| PWH3_L1p2_G5_C0_392           | OR105535                 |
| PWH3_L1p2_F2_C0_412           | OR105536                 |
| PWH3_L1p2_D12_C0_394          | OR105537                 |
| PWH3_L1p2_D3_C0_399           | OR105538                 |
| PWH3_L1p2_C11_C0_329          | OR105539                 |
| PWH3_L1p2_C8_C0_432           | OR105540                 |
| PWH3_L1p2_C2_C0_366           | OR105541                 |
| PWH3_L1p2_B10_C0_371          | OR105542                 |
| PWH3_L1p2_A10_C0_42           | OR105543                 |
| PWH3_L1p1_H7_C0_263           | OR105544                 |
| PWH3_L1p1_G3_C0_365_inversion | OR105545                 |
| PWH3_L1p1_G1_C0_430           | OR105546                 |
| PWH3_L1p1_F7_C0_350           | OR105547                 |
| PWH3_L1p1_F3_C0_418_inversion | OR105548                 |
| PWH3_L1p1_E12_C0_413          | OR105549                 |
| PWH3_L1p1_E10_C0_430          | OR105550                 |
| PWH3_L1p1_D9_C0_436           | OR105551                 |
| PWH3_L1p1_D8_C0_366           | OR105552                 |
| PWH3_L1p1_C6_C0_390           | OR105553                 |
| PWH3_L1p1_B5_C0_422           | OR105554                 |
| PWH3_L1p1_B4_C0_392           | OR105555                 |
| PWH3_L1p1_A6_C0_433           | OR105556                 |
